# Supplementary material for: Sequencing Degraded RNA Addressed by 3' Tag Counting
Source: PLoS One. 2014 Mar 14;9(3):e91851. doi: 10.1371/journal.pone.0091851 (PMC3954844; doi:10.1371/journal.pone.0091851)

a)

Altered Illumina TruSeq library preparation:  
Automation and CA purification.

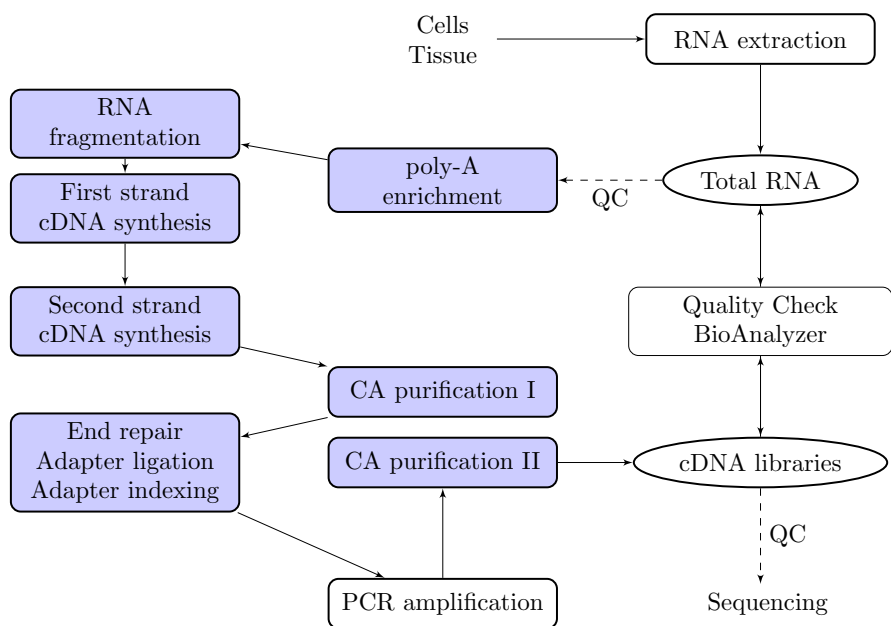

b)

Altered Illumina TruSeq library preparation:  
Automation, CA purification and ribosomal depletion.

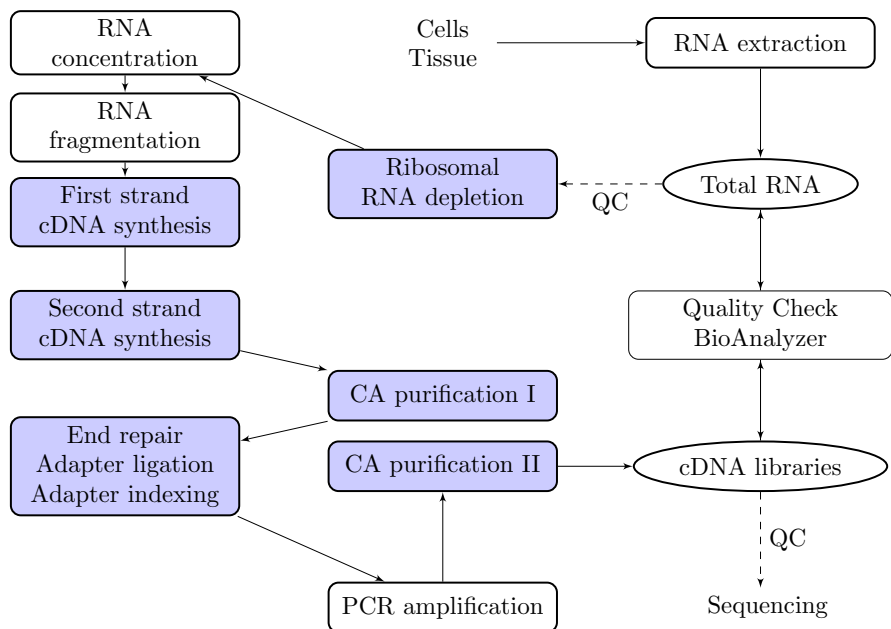

Supplement: Figure S1 — Flowchart of the two library preparations protocols used. a) poly-A enrichment and b) ribosomal depletion. The steps shaded with blue have been automated on a Magnatrix 1200 Biomagnetic Workstation. After RNA extraction the RNA is run through a quality check (QC) with a BioAnalyzer and Qubit quantification fluorometer. The dotted QC line indicates that it is only safe to continue with the procedure depending on the results from the quality check. The cDNA libraries go through the same quality check procedure after the CA purification (The CA purification is a washing step based on carboxil acid beads). The alterations from the standard protocol lie in the automation and the CA purification as well as the ribosomal depletion for the protocol in b). (PDF) [file pone.0091851.s001.pdf]
