# Supplementary material for: Sequencing Degraded RNA Addressed by 3' Tag Counting
Source: PubMed Central journal article supplement (PMC3954844; doi:10.1371/journal.pone.0091851), 2014-03-14

## Original GTF

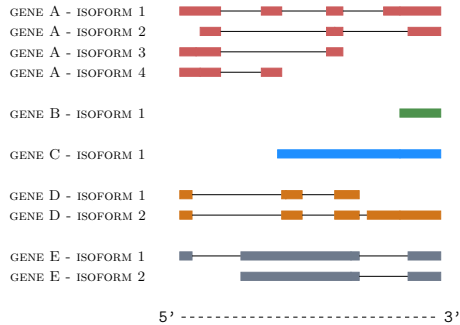

isoform filtering

## 3TC process

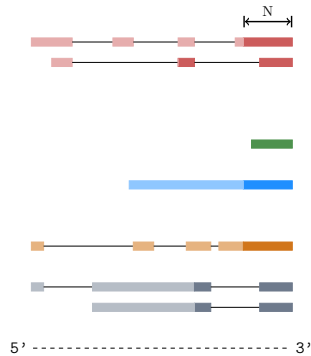

length restriction

## Final GTF

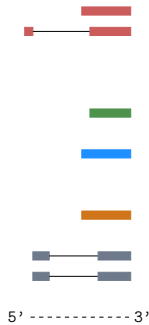

Supplement: pone.0091851.s002.pdf [file pone.0091851.s002.pdf]
