# Supplementary material for: Sequencing Degraded RNA Addressed by 3' Tag Counting
Source: PubMed Central journal article supplement (PMC3954844; doi:10.1371/journal.pone.0091851), 2014-03-14

RIN 10 vs. RIN 8

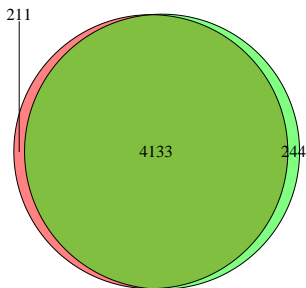

RIN 10 vs. RIN 6

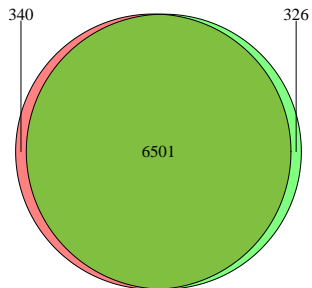

RIN 10 vs. RIN 4

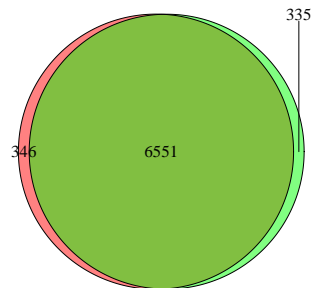

RIN 10 vs. RIN 2

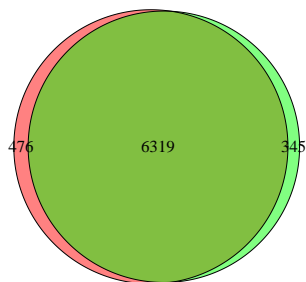

RIN 10 vs. RiboMinus

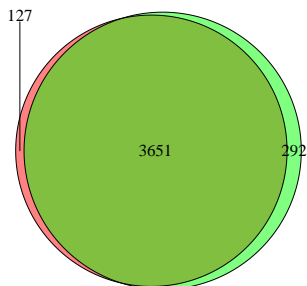

RIN 8 vs. RIN 6

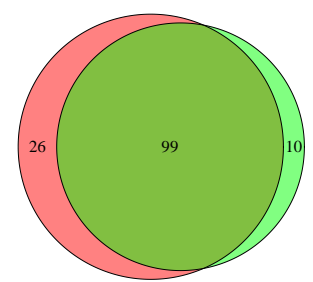

RIN 8 vs. RIN 4

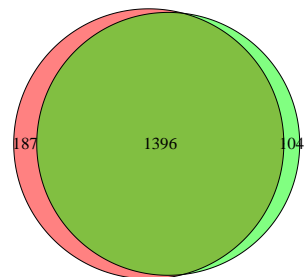

RIN 8 vs. RIN 2

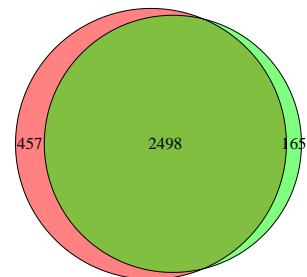

RIN 6 vs. RIN 4

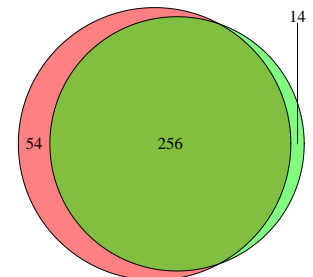

RIN 6 vs. RIN 2

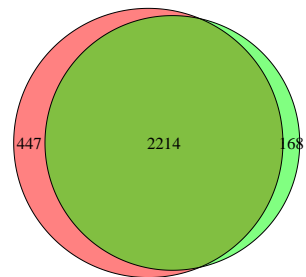

RIN 4 vs. RIN 2

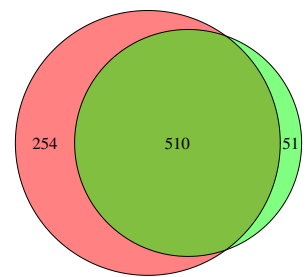

U251 vs. U2-OS (control)

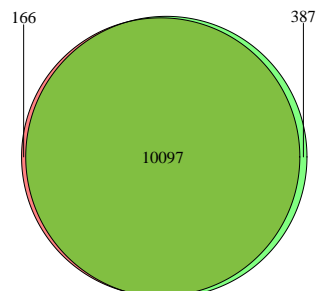

Supplement: pone.0091851.s004.pdf [file pone.0091851.s004.pdf]
