# Supplementary material for: Sequencing Degraded RNA Addressed by 3' Tag Counting
Source: PubMed Central journal article supplement (PMC3954844; doi:10.1371/journal.pone.0091851), 2014-03-14

# rRNA reads in samples with low and high RIN after being treated with RiboMinus

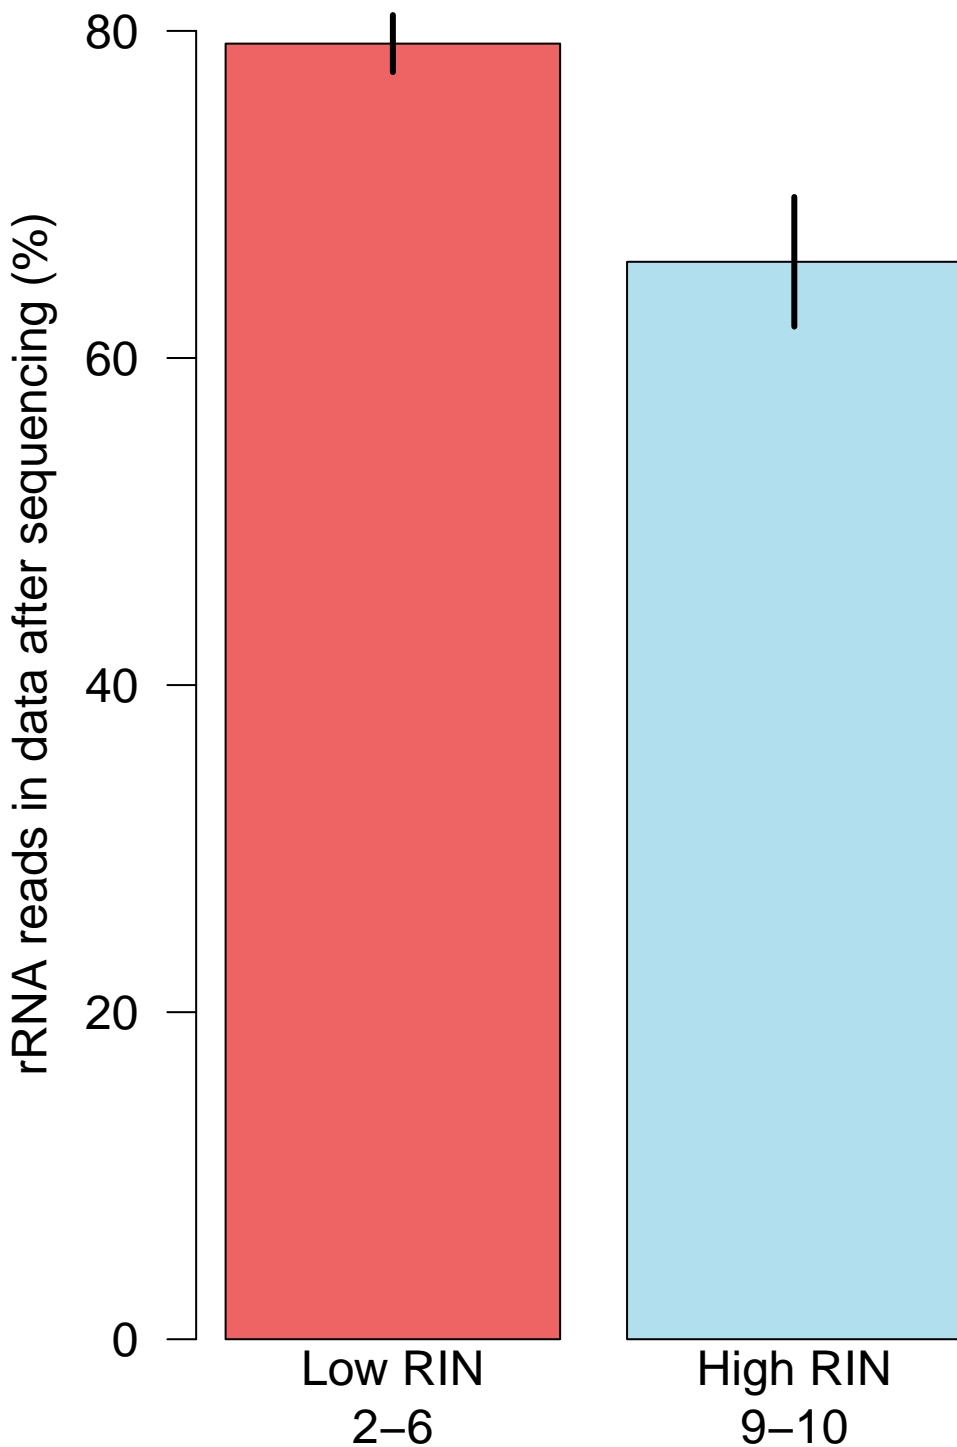

Supplement: pone.0091851.s007.pdf [file pone.0091851.s007.pdf]
