# Supplementary material for: Sequencing Degraded RNA Addressed by 3' Tag Counting
Source: PubMed Central journal article supplement (PMC3954844; doi:10.1371/journal.pone.0091851), 2014-03-14

a)

**Effects of 3TC with varying N**  
**-all RIN 10 comparisons-**

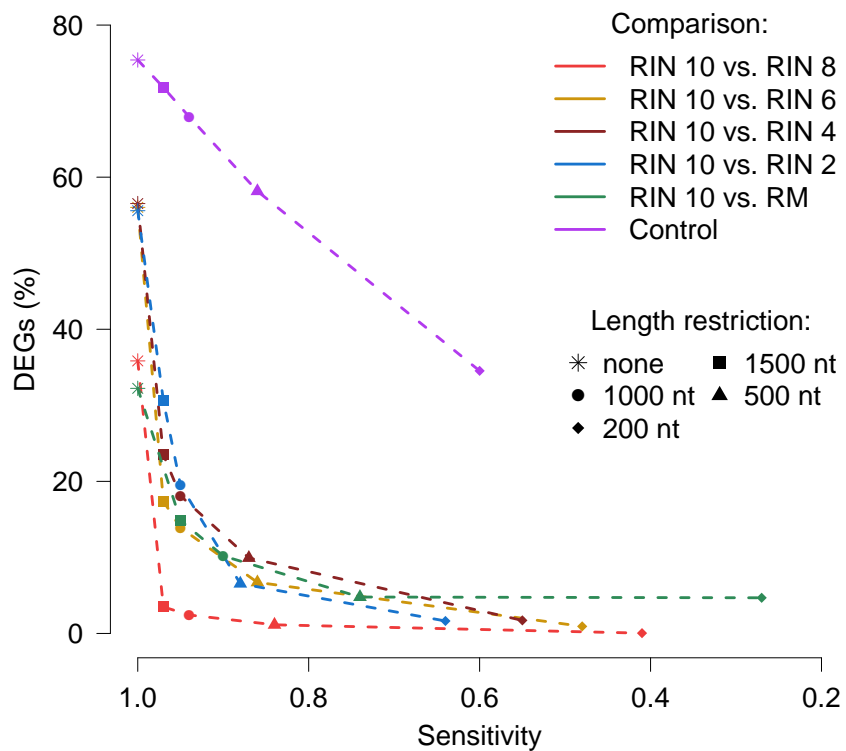

b)

**Effects of 3TC with varying N**  
**-all other comparisons-**

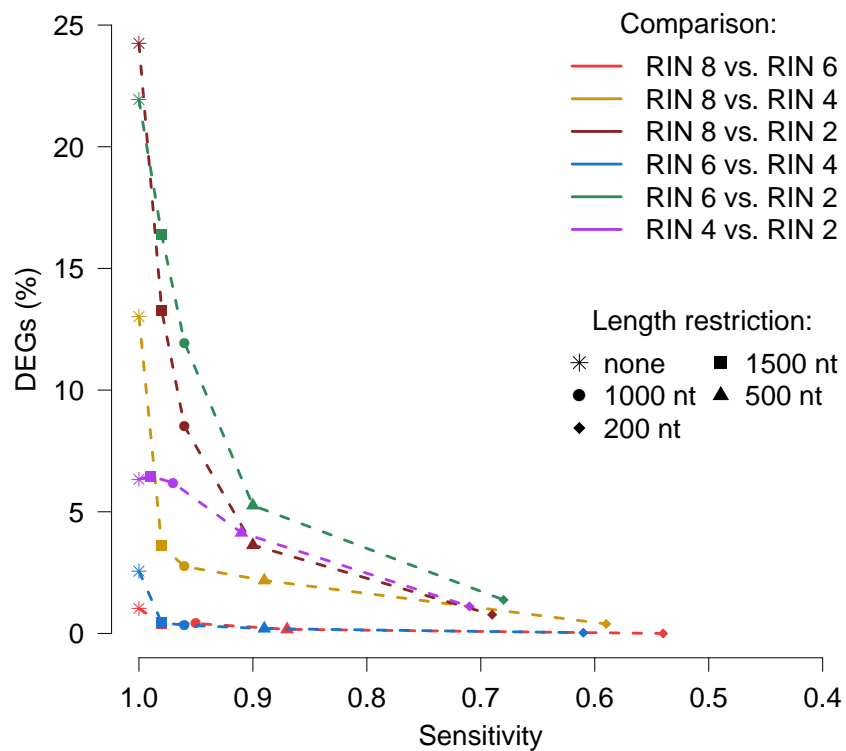

c)

**Effects of 3TC with varying N**  
**-all RIN 10 comparisons-**

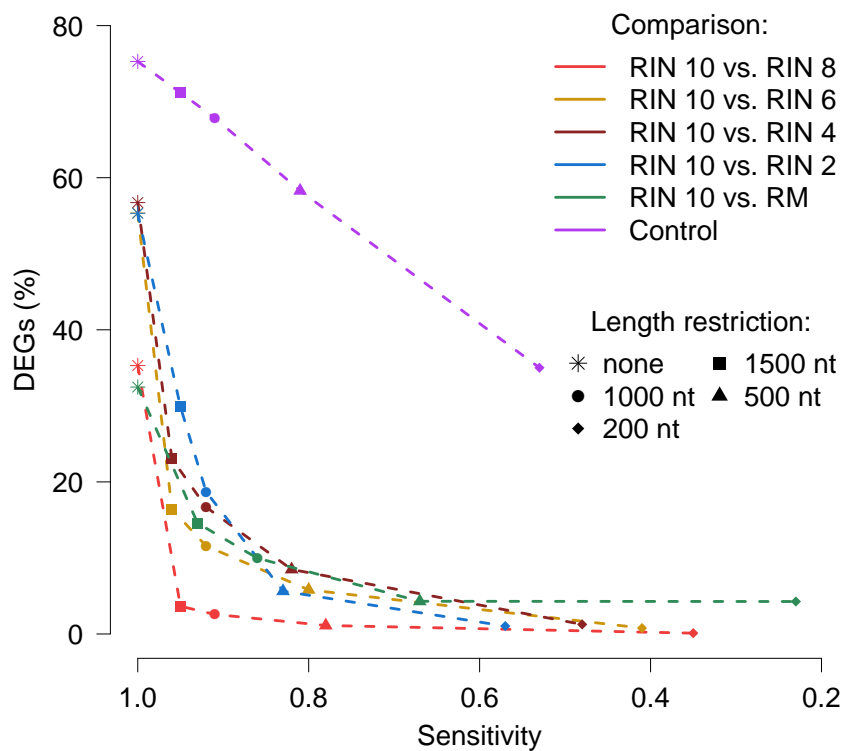

d)

**Effects of 3TC with varying N**  
**-all other comparisons-**

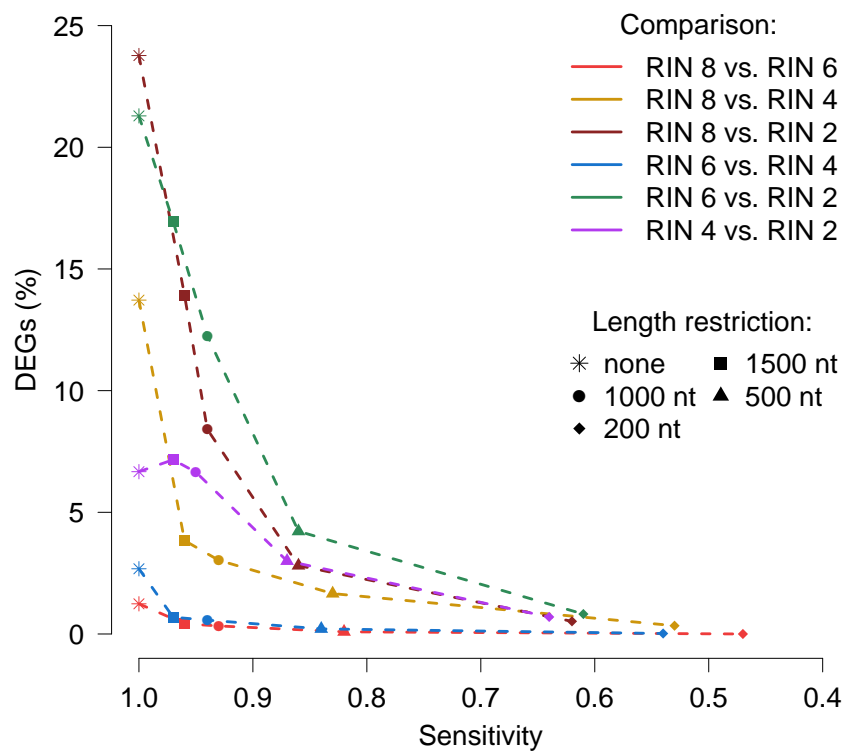

Supplement: pone.0091851.s008.pdf [file pone.0091851.s008.pdf]
